# Supplementary material
Source: PubMed Central journal article supplement (PMC6463622)
Supplement: DC171682SupplementaryData.pdf [file DC171682SupplementaryData.pdf]

SUPPLEMENTARY DATA

**Supplementary Table 1.** Demographics of study participants

| <i>Characteristic</i>                                                   | <i>Value</i>          |
|-------------------------------------------------------------------------|-----------------------|
| Participants (n)                                                        | 31                    |
| Age at Enrollment (yr.)                                                 | 17.8 ± 3.9            |
| Type 1 diabetes duration (yr)                                           | 9.3 ± 5.5             |
| Enrollment HbA1c (%)                                                    | 7.8 ± 0.9             |
| Gender                                                                  | Male = 16 Female = 15 |
| BMI (kg/m <sup>2</sup> )                                                | 23.4 ± 3.6            |
| Participants who elected to continue device use after 3 month trial (%) | 87                    |
